# Supplementary material for: Green removal of unpleasant volatiles from soapberry (Sapindus mukorossi) extracts by two-phase microbial fermentation fortified with pomelo peel waste
Source: Royal Society of Chemistry journal article supplement (doi:10.1039/d3ra01858j), 2023-01-01
Supplement: d3ra01858j1.pdf [file d3ra01858j1.pdf]

## 1 **Supplementary data**

2 Table S1. Changes in total soluble solids (°Brix), pH, and reducing sugar content (g glucose/L) of  
3 soapberry extracts fortified with 0%, 7.5% và 15% pomelo peels (PP) during 15-day fermentation by  
4 active dry yeast *Saccharomyces cerevisiae* (ADY) and lactic acid bacteria *Levilactobacillus brevis*  
5 (LB).

6 Table S2. Changes in saponin content (g QSE/L) of soapberry extracts fortified with 0%, 7.5% và  
7 15% pomelo peels (PP) during 15-day fermentation by active dry yeast *Saccharomyces cerevisiae*  
8 (ADY) and lactic acid bacteria *Levilactobacillus brevis* (LB).

9 Table S3. Changes in microbial density (log CFU/mL) of soapberry extracts fortified with 0%, 7.5%  
10 và 15% pomelo peels (PP) during 15-day fermentation by active dry yeast *Saccharomyces cerevisiae*  
11 (ADY) and lactic acid bacteria *Levilactobacillus brevis* (LB).

12 Table S4. Consumers' overall liking scores of unfermented (SBE) and fermented soapberry extracts  
13 fortified with 0%, 7.5% và 15% pomelo peels (PP) after 15-day fermentation by (a) active dry yeast  
14 *Saccharomyces cerevisiae* (ADY) and (b) lactic acid bacteria *Levilactobacillus brevis* (LB).

15 Table S1. Changes in total soluble solids (°Brix), pH, and reducing sugar content (g glucose/L) of  
 16 soapberry extracts fortified with 0%, 7.5% và 15% pomelo peels (PP) during 15-day fermentation  
 17 by active dry yeast *Saccharomyces cerevisiae* (ADY) and lactic acid bacteria *Levilactobacillus*  
 18 *brevis* (LB).

|               | Day of fermentation |               |               |               |               |                |
|---------------|---------------------|---------------|---------------|---------------|---------------|----------------|
|               | 0                   | 1             | 3             | 5             | 10            | 15             |
| Brix          |                     |               |               |               |               |                |
| ADY_0% PP     | 14.5a (0.6)         | 10.5b (0.33)  | 10.3b (0.3)   | 10.0b (<0.01) | 11.0b (<0.01) | 10.1b (0.6)    |
| ADY_7.5% PP   |                     | 11.0b (<0.01) | 10.8b (0.3)   | 11.0b (<0.01) | 10.3b (0.6)   | 9.4a (0.6)     |
| ADY_15% PP    |                     | 11.0b (<0.01) | 11.0b (0.1)   | 11.0b (<0.01) | 10.6b (0.5)   | 9.5a (0.7)     |
| LB_0% PP      |                     | 10.8b (0.3)   | 10.0a (<0.01) | 10.0b (<0.01) | 10.8b (0.5)   | 10.6a (0.1)    |
| LB_7.5% PP    |                     | 10.9b (0.3)   | 10.1b (0.3)   | 10.1b (0.3)   | 10.3b (0.5)   | 10.8b (0.2)    |
| LB_15% PP     |                     | 11.0b (0.4)   | 10.6b (0.3)   | 10.3b (0.5)   | 10.5b (0.7)   | 11.0b (<0.01)  |
| pH            |                     |               |               |               |               |                |
| ADY_0% PP     | 4.17a (0.02)        | 4.10c (0.03)  | 4.07c (0.02)  | 4.02b (0.01)  | 3.99a (0.04)  | 4.00a (0.05)   |
| ADY_7.5% PP   |                     | 4.17a (0.01)  | 4.15a (0.01)  | 4.09a (0.01)  | 4.04a (0.05)  | 3.99a (0.21)   |
| ADY_15% PP    |                     | 4.22a (0.01)  | 4.19a (0.02)  | 4.14a (0.03)  | 4.04a (0.14)  | 4.07a (0.17)   |
| LB_0% PP      |                     | 3.95c (0.01)  | 3.75b (0.03)  | 3.73a (0.02)  | 3.70a (0.02)  | 3.73a (0.02)   |
| LB_7.5% PP    |                     | 3.95b (0.02)  | 3.79a (0.02)  | 3.75a (0.01)  | 3.74a (0.02)  | 3.77a (0.06)   |
| LB_15% PP     |                     | 3.98c(0.02)   | 3.84b (0.03)  | 3.79a (0.02)  | 3.75a (0.04)  | 3.79a (<0.001) |
| Glucose (g/L) |                     |               |               |               |               |                |
| ADY_0% PP     | 12.52a (0.62)       | 9.35b (0.69)  | 7.83a (0.08)  | 6.59a (0.68)  | 6.63a (0.04)  | 6.56a (0.34)   |
| ADY_7.5% PP   |                     | 9.33c (0.55)  | 8.00b (0.04)  | 7.55b (0.32)  | 4.55a (0.02)  | 4.77a (0.11)   |
| ADY_15% PP    |                     | 11.00c (0.64) | 8.11b (0.01)  | 7.99b (0.38)  | 4.33a (0.10)  | 4.88a (0.05)   |
| LB_0% PP      |                     | 7.88b (0.15)  | 5.55a (0.10)  | 5.77a (0.27)  | 5.88a (0.11)  | 5.33a (0.27)   |
| LB_7.5% PP    |                     | 6.99b (0.28)  | 5.99a (0.18)  | 5.66a (0.12)  | 5.44a (0.18)  | 5.88a (0.28)   |
| LB_15% PP     |                     | 6.00a (0.02)  | 5.77a (0.09)  | 5.88a (0.08)  | 5.77a (0.07)  | 5.88a (0.24)   |

Notes: The results were presented as mean (standard deviation) of triplicates and different letters in the same columns indicate that the mean values were significantly different at 95% confidence level.

20 Table S2. Changes in saponin content (g QSE/L) of soapberry extracts fortified with 0%, 7.5% và  
 21 15% pomelo peels (PP) during 15-day fermentation by active dry yeast *Saccharomyces cerevisiae*  
 22 (ADY) and lactic acid bacteria *Levilactobacillus brevis* (LB).

|             | Day of fermentation |                |                |                |                |                |
|-------------|---------------------|----------------|----------------|----------------|----------------|----------------|
|             | 0                   | 1              | 3              | 5              | 10             | 15             |
|             | Saponin (g QSE/L)   |                |                |                |                |                |
| ADY_0% PP   |                     | 127.51a (1.48) | 129.91a (1.81) | 143.81b (5.63) | 124.31a (2.57) | 125.21a (3.51) |
| ADY_7.5% PP |                     | 126.87a (0.28) | 136.91b (1.64) | 144.11c (5.17) | 124.71a (2.77) | 145.01c (2.49) |
| ADY_15% PP  |                     | 134.73c (3.33) | 135.51c (1.19) | 125.91a (1.85) | 122.01a (5.45) | 121.31a (0.60) |
| LB_0% PP    | 131.73a (1.88)      | 110.60a (3.79) | 117.11a (1.34) | 139.71d (0.37) | 137.21d (2.62) | 125.61b (7.70) |
| LB_7.5% PP  |                     | 106.96a (8.12) | 118.61a (0.42) | 124.11b (0.65) | 140.91c (4.10) | 129.91b (8.52) |
| LB_15% PP   |                     | 102.59a (3.42) | 130.21c (0.94) | 131.71c (3.42) | 128.51c (3.13) | 118.19 (3.55)  |

Notes: The results were presented as mean (standard deviation) of triplicates and different letters in the same columns indicate that the mean values were significantly different at 95% confidence level.

23

24

25 Table S3. Changes in microbial density (log CFU/mL) of soapberry extracts fortified with 0%,  
 26 7.5% và 15% pomelo peels (PP) during 15-day fermentation by active dry yeast *Saccharomyces*  
 27 *cerevisae* (ADY) and lactic acid bacteria *Levilactobacillus brevis* (LB).

|             | Day of fermentation            |              |               |               |              |               |
|-------------|--------------------------------|--------------|---------------|---------------|--------------|---------------|
|             | 0                              | 1            | 3             | 5             | 10           | 15            |
|             | Microbial density (log CFU/mL) |              |               |               |              |               |
| ADY_0% PP   |                                | 8.98a (0.39) | 7.48a (0.37)  | 6.05a (0.05)  | 4.70a (0.01) | 2.14a (<0.01) |
| ADY_7.5% PP |                                | 8.78a (0.25) | 8.29a (0.10)  | 5.30a (0.31)  | 4.44a (0.06) | 3.23a (0.16)  |
| ADY_15% PP  | 8.00a                          | 8.16a (0.09) | 8.24a (0.07)  | 5.15a (<0.01) | 4.04a (0.06) | 1.57a (0.04)  |
| LB_0% PP    | (<0.01)                        | 8.67a (0.42) | 8.00a (<0.01) | 6.30a (0.01)  | 4.98a (0.03) | 3.81a (<0.01) |
| LB_7.5% PP  |                                | 8.48a (0.13) | 8.50a (0.28)  | 6.07a (0.17)  | 4.65a (0.07) | 3.64a (0.02)  |
| LB_15% PP   |                                | 8.38a (0.27) | 8.24a (0.34)  | 5.71a (0.19)  | 4.44a (0.06) | 3.49a (0.01)  |

Notes: The results were presented as mean (standard deviation) of triplicates and different letters in the same columns indicate that the mean values were significantly different at 95% confidence level.

29 Table S4. Consumers' overall liking scores of unfermented (SBE) and fermented soapberry extracts  
 30 fortified with 0%, 7.5% và 15% pomelo peels (PP) after 15-day fermentation by (a) active dry yeast  
 31 *Saccharomyces cerevisiae* (ADY) and (b) lactic acid bacteria *Levilactobacillus brevis* (LB).

| Panelist | SBE | ADY_0% PP | ADY_7.5% PP | ADY_15% PP | LB_0% PP | LB_7.5% PP | LB_15% PP |
|----------|-----|-----------|-------------|------------|----------|------------|-----------|
| 1        | 2   | 3         | 2           | 2          | 3        | 3          | 3         |
| 2        | 2   | 2         | 3           | 4          | 3        | 4          | 3         |
| 3        | 2   | 3         | 3           | 4          | 2        | 3          | 3         |
| 4        | 2   | 2         | 3           | 2          | 2        | 2          | 3         |
| 5        | 2   | 2         | 3           | 4          | 2        | 2          | 3         |
| 6        | 5   | 3         | 5           | 5          | 3        | 3          | 5         |
| 7        | 2   | 2         | 2           | 2          | 2        | 2          | 2         |
| 8        | 4   | 3         | 4           | 3          | 2        | 2          | 4         |
| 9        | 3   | 4         | 4           | 4          | 2        | 2          | 2         |
| 10       | 2   | 2         | 3           | 4          | 3        | 4          | 4         |
| 11       | 2   | 4         | 4           | 4          | 4        | 4          | 4         |
| 12       | 4   | 3         | 4           | 2          | 3        | 3          | 3         |
| 13       | 2   | 2         | 2           | 2          | 2        | 2          | 2         |
| 14       | 2   | 2         | 5           | 4          | 2        | 3          | 4         |
| 16       | 3   | 3         | 3           | 3          | 3        | 3          | 3         |
| 17       | 0   | 0         | 1           | 2          | 0        | 1          | 1         |
| 18       | 3   | 2         | 3           | 2          | 2        | 3          | 4         |
| 19       | 5   | 1         | 3           | 2          | 1        | 2          | 3         |
| 20       | 2   | 5         | 5           | 4          | 4        | 1          | 5         |
| 21       | 3   | 4         | 5           | 5          | 5        | 5          | 4         |
| 22       | 2   | 2         | 3           | 2          | 2        | 2          | 3         |
| 23       | 3   | 3         | 4           | 4          | 4        | 4          | 5         |
| 24       | 3   | 3         | 3           | 3          | 3        | 3          | 3         |
| 25       | 3   | 2         | 2           | 3          | 4        | 2          | 4         |
| 26       | 1   | 1         | 3           | 2          | 1        | 2          | 2         |
| 27       | 2   | 1         | 3           | 3          | 4        | 3          | 4         |
| 28       | 1   | 2         | 4           | 3          | 3        | 4          | 4         |
| 29       | 2   | 3         | 4           | 3          | 3        | 3          | 3         |
| 30       | 2   | 1         | 2           | 3          | 3        | 3          | 4         |
